# Supplementary material
Source: publisher figshare collection journal article supplement (https://gsajournals.figshare.com/ndownloader/files/14844278)
Supplement: Supplementary file 1 [file 14844278]

NSFTV_ID	Tiller No Salt	Tiller No Control	Tiller No Ratio	Ht Lig Salt	Ht Lig Control	Ht Lig Ratio	Ht FE Salt	Ht FE Control	Ht FE Ratio
NSFTV_1	1.999271558	1.580343035	1.265087081	24.21280308	27.82176051	0.870282924	63.74549747	81.1674223	0.78535816
NSFTV_3	2.415938224	2.330343035	1.036730725	24.04613642	27.23842717	0.882801942	66.0788308	77.37575564	0.853999166
NSFTV_4	1.68003438	1.830343035	0.917879517	23.8967732	28.23842717	0.846250149	65.29037357	79.50075564	0.821254755
NSFTV_5	2.832604891	2.319706215	1.221105014	20.33780308	24.34553071	0.835381382	58.16216414	71.66216208	0.811616095
NSFTV_6	1.553356828	1.097982234	1.41473767	22.01699975	24.8677722	0.885362773	60.50866451	73.69271706	0.821094226
NSFTV_7	1.471701047	1.413676369	1.041045234	19.29260653	25.11342717	0.768218786	57.29037357	71.58408897	0.800322731
NSFTV_8	2.508679885	2.215488918	1.132336914	21.35926735	24.25586633	0.880581508	62.28648071	67.8046436	0.918616741
NSFTV_9	1.830369971	1.324794283	1.381625808	22.79090002	27.34805918	0.83336444	56.02070352	76.71585918	0.730236279
NSFTV_10	1.761132794	1.99146095	0.884342118	16.72487014	22.59805918	0.740102059	46.08641295	61.90335918	0.744489694
NSFTV_11	2.121028926	2.565510739	0.826747241	21.22007076	25.72431155	0.82490335	63.28563262	76.7172546	0.824920456
NSFTV_13	2.247036638	2.697849719	0.832899113	23.37423335	27.0015213	0.865663571	64.39570352	75.09184884	0.857559169
NSFTV_14	2.497036638	1.864516385	1.33924092	17.83256669	19.98485464	0.892304048	51.47903685	59.55018217	0.864464809
NSFTV_15	3.693559634	3.655416131	1.010434791	21.05505187	23.91418503	0.880441957	55.70831467	69.1252435	0.805904064
NSFTV_16	2.413703305	2.031183052	1.18832387	23.20756669	26.58485464	0.872961955	59.68737018	73.30018217	0.814286792
NSFTV_17	2.631721804	2.376975566	1.107172426	15.43246737	17.70223276	0.871780841	41.67312449	50.85341688	0.819475407
NSFTV_18	3.052799461	3.697849719	0.825560716	22.37070347	26.20985464	0.853522607	61.50307962	76.67518217	0.802124989
NSFTV_22	1.884455242	1.487017244	1.267271949	25.26176336	26.95328713	0.937242394	63.90887056	76.89045904	0.831167759
NSFTV_23	2.330369971	2.114516385	1.102081775	18.91590002	22.33485464	0.846922907	59.31237018	68.92518217	0.860532658
NSFTV_24	2.080369971	1.947849719	1.068034126	21.91590002	25.58485464	0.856596621	57.31237018	70.3835155	0.814286837
NSFTV_25	2.636132794	2.11646095	1.245538121	23.59987014	27.78555918	0.849357394	56.54474629	71.15335918	0.79468836
NSFTV_26	2.127222984	1.594271164	1.334291827	23.69413212	27.48227212	0.862160597	59.36888183	73.03790297	0.812850307
NSFTV_27	1.997036638	2.364516385	0.844585663	19.41590002	23.29318797	0.833544126	51.10403685	62.3835155	0.819191359
NSFTV_29	2.663703305	3.074794283	0.866302933	22.66590002	25.41055918	0.891987455	60.18737018	75.15335918	0.800860678
NSFTV_31	3.024658048	2.86646095	1.055188994	21.13314881	22.99389252	0.919076611	51.45852071	60.61169251	0.848986698
NSFTV_32	2.413703305	2.281183052	1.058092775	22.20756669	26.8765213	0.82628129	54.52070352	74.2585155	0.734201366
NSFTV_33	2.636132794	2.658127616	0.991725446	22.28737014	25.41055918	0.877090897	61.48224629	74.73669251	0.822651421
NSFTV_35	2.747036638	2.864516385	0.95898793	20.20756669	22.58485464	0.894739728	59.35403685	71.46684884	0.830511458
NSFTV_39	3.070214529	2.679321755	1.145892435	25.39642634	26.13569724	0.971714131	68.40413525	80.4523799	0.850243776
NSFTV_40	1.851974114	1.881494677	0.984310047	19.96742949	26.20728704	0.76190372	55.50253913	73.50606602	0.75507427
NSFTV_41	1.810307447	1.600564893	1.131042831	26.12364267	31.41880818	0.831465106	60.5843456	85.26742782	0.710521557
NSFTV_43	4.139793824	4.337883446	0.95433496	14.31806628	16.83991583	0.850245715	45.75574857	53.34038901	0.857806803
NSFTV_44	1.959031001	2.087883446	0.938285614	22.84242949	26.92324916	0.848427668	59.33587246	76.34038901	0.777253997
NSFTV_45	2.473835192	2.148229364	1.151569396	21.9991121	27.13721747	0.810662041	60.25083577	76.02218294	0.792542827
NSFTV_46	1.875697668	1.921216779	0.976307145	20.96742949	26.50658249	0.791027266	57.87753913	77.29872235	0.748751562
NSFTV_49	2.473127157	1.98376369	1.246684356	19.48473294	26.94440873	0.723145686	57.29741523	77.88469266	0.735669787
NSFTV_50	1.792364335	1.298161343	1.380694583	22.55076283	27.60312037	0.816964261	63.5942058	82.50606602	0.770782184
NSFTV_53	2.042364335	2.421216779	0.843528077	23.34242949	29.88158249	0.781164435	61.00253913	82.04872235	0.74349164
NSFTV_55	1.875697668	1.631494677	1.149680532	22.05076283	30.10312037	0.732507546	56.1692058	82.83939936	0.678049409
NSFTV_56	2.459031001	2.131494677	1.153665091	19.21742949	23.60312037	0.814190208	51.9192058	70.58939936	0.735509953
NSFTV_57	2.875697668	2.754550113	1.043980886	21.30076283	26.71491583	0.797335951	56.9192058	78.42372235	0.725790668
NSFTV_58	2.709031001	2.46482801	1.099075063	24.13409616	30.43645371	0.792933907	62.83587246	80.31856602	0.782333097
NSFTV_59	1.209031001	1.71482801	0.705045051	21.75909616	26.06145371	0.834914906	64.1692058	81.75606602	0.784886173
NSFTV_60	2.018640781	1.850564893	1.090824098	20.54030934	24.25214151	0.846948272	52.35517893	69.24659448	0.756068646
NSFTV_61	2.931460491	2.421216779	1.210738549	23.31806628	27.63158249	0.843891814	69.85991523	81.17372235	0.860622295
NSFTV_63	3.787695593	3.773844072	1.003670401	20.74090409	22.69931155	0.913723927	56.34813262	64.4672546	0.874058202
NSFTV_65	2.459031001	1.798161343	1.367525228	24.00076283	28.64478704	0.837875415	61.37753913	79.42273269	0.77279561
NSFTV_66	2.908647731	2.84404436	1.022715318	21.54523559	26.69082109	0.807215167	60.10350259	77.13408465	0.779208088
NSFTV_67	2.625697668	2.587883446	1.014612027	22.05076283	26.79824916	0.822843414	58.5442058	74.54872235	0.785314677
NSFTV_68	3.625697668	3.587883446	1.010539423	20.42576283	23.67324916	0.862820422	58.75253913	64.63205568	0.909030952
NSFTV_69	1.542364335	1.754550113	0.879065421	23.38409616	27.33991583	0.855309735	60.46087246	76.38205568	0.791558592
NSFTV_70	2.709031001	3.004550113	0.901642808	18.30076283	23.83991583	0.767652158	52.46087246	68.79872235	0.762526842
NSFTV_71	4.709031001	4.587883446	1.026405979	14.75909616	16.96491583	0.869977565	43.6692058	51.34038901	0.850581903
NSFTV_72	3.459031001	3.087883446	1.120194807	15.34242949	17.96491583	0.854021786	45.25253913	57.13205568	0.792069156
NSFTV_73	2.098127157	2.087883446	1.004906266	22.40139961	24.08991583	0.929907758	57.94324857	68.46538901	0.846314458
NSFTV_74	2.709031001	2.504550113	1.08164376	20.96742949	24.08991583	0.870382016	60.00253913	72.34038901	0.829447283
NSFTV_75	1.875697668	1.980522645	0.947072063	24.96742949	30.53176086	0.817752687	62.62753913	80.09485044	0.781917174
NSFTV_76	3.5237926	3.510711027	1.003726189	16.73529902	18.60748775	0.899385196	51.51359099	58.00908465	0.888026269
NSFTV_77	2.625697668	2.337883446	1.123108884	21.05076283	27.33991583	0.769964434	58.37753913	77.29872235	0.755219975
NSFTV_78	3.209031001	2.813855978	1.140438966	21.25909616	24.24009419	0.877022011	61.62753913	71.11568377	0.866581545
NSFTV_79	2.542364335	2.171216779	1.170939889	22.46742949	28.33991583	0.792783918	56.33587246	71.04872235	0.792918868
NSFTV_80	3.198253926	3.034870759	1.053835297	22.90427089	28.46481988	0.804651882	62.49605302	77.43855591	0.807040528
NSFTV_81	2.045284387	1.905544495	1.073333313	22.50723671	23.48687736	0.958289873	61.75974417	71.56412208	0.862998698
NSFTV_83	3.176771624	2.613877828	1.215348166	20.42675606	25.88271069	0.789204667	53.49561216	72.95995542	0.733218816
NSFTV_84	1.995017377	1.790683242	1.114109593	24.66498312	26.63695872	0.92596844	61.29959352	73.85502586	0.829998945
NSFTV_85	2.411684044	2.374016576	1.015866556	22.83164978	28.59529205	0.798440867	65.10792686	80.39669253	0.8098334
NSFTV_86	1.995017377	1.823920263	1.093807343	22.74831645	25.49812196	0.892156547	62.69126019	74.44849798	0.842075554
NSFTV_87	2.176771624	1.738877828	1.25182551	22.69758939	24.90354402	0.911420052	63.05394549	72.95995542	0.864226755
NSFTV_88	2.078350711	1.624016576	1.279759543	22.87331645	24.92862539	0.917552256	65.64959352	77.77169253	0.844132246
NSFTV_89	1.911684044	1.707349909	1.11967912	20.33164978	24.09529205	0.843801758	57.59126019	69.35502586	0.830383371
NSFTV_92	2.495017377	1.874016576	1.331374231	24.62331645	28.97029205	0.849950577	57.43292686	73.10502586	0.78562214
NSFTV_93	1.995017377	2.207349909	0.903806582	24.24831645	28.84529205	0.840633418	61.72459352	79.77169253	0.773765625
NSFTV_94	2.778229989	3.186176975	0.871963488	22.91282652	25.88358015	0.885226324	56.41219308	70.16164066	0.804031841
NSFTV_96	2.161684044	1.707349909	1.266104876	19.08164978	25.13695872	0.759107337	54.66626019	71.4383592	0.765222785
NSFTV_97	2.245017377	2.540683242	0.88362742	23.12331645	25.72029205	0.899030089	59.27459352	73.8133592	0.80303341
NSFTV_98	2.578350711	2.352843642	1.095844477	20.16498312	23.42524682	0.860822653	57.73292686	67.65330733	0.853364442
NSFTV_99	1.876650902	2.176038228	0.86241633	22.79959947	24.90016546	0.915640481	60.10821172	71.09157022	0.845504067
NSFTV_100	1.670284387	1.801038228	0.927400852	24.31973671	27.40016546	0.887576272	62.38474417	76.84157022	0.811861913
NSFTV_101	1.578350711	1.624016576	0.971880912	19.53998312	24.01195872	0.813760483	49.98292686	63.98002586	0.78122705
NSFTV_102	3.411684044	3.040683242	1.122012315	17.83164978	20.26195872	0.880055578	51.65792686	60.89669253	0.848287891
NSFTV_103	2.631801458	2.269510308	1.159634062	19.69663122	22.27941349	0.884073148	53.16972333	59.50747399	0.89349656
NSFTV_105	2.653229989	2.374016576	1.117612242	22.16282652	26.13695872	0.847949708	65.45802642	79.73002586	0.820995926
NSFTV_106	3.919630029	3.968816948	0.987606655	14.20909998	17.16514537	0.82778792	48.22929649	57.03315116	0.845636187
NSFTV_107	2.047726986	1.635483615	1.252062061	23.22604063	26.7484787	0.868312583	61.6758474	74.28315116	0.83028044
NSFTV_108	1.355357268	1.068238786	1.268777436	21.03459802	27.62994542	0.761297125	56.9276666	76.04625817	0.748592606
NSFTV_109	2.502963362	2.468816948	1.013831084	22.79243332	26.6234787	0.85610275	63.97929649	84.15815116	0.760226973
NSFTV_110	1.625021646	1.866182417	0.870773206	26.59691788	28.62668438	0.929095299	65.79668827	80.39103964	0.818457984
NSFTV_113	2.397023935	2.256078387	1.062473693	25.11793136	29.75832399	0.844064046	65.75683327	75.76881003	0.867861502
NSFTV_114	2.336296695	2.385483615	0.979380735	23.62576665	26.66514537	0.886016796	60.03762982	73.32481783	0.81879003
NSFTV_115	2.086296695	2.302150281	0.906238273	26.00076665	29.3734787	0.885178324	62.42929649	81.90815116	0.762186615
NSFTV_116	2.502963362	1.885483615	1.327491441	23.70909998	27.58181203	0.859591819	59.70429649	74.94981783	0.796590282
NSFTV_117	3.086296695	2.885483615	1.069594254	22.25076665	24.95681203	0.891570871	58.68762982	74.3664845	0.789167731
NSFTV_118	2.836296695	2.878706108	0.985267891	22.16743332	24.2578639	0.913824622	56.52929649	69.71229805	0.810894176
NSFTV_119	2.296987621	2.415910654	0.95077507	16.57475884	20.49596777	0.808683885	52.15467218	63.58095935	0.820287594
NSFTV_120	2.380320955	2.665910654	0.892873492	21.4914255	24.07930111	0.892526964	61.36300552	72.91429268	0.84157719
NSFTV_121	3.150701746	2.665910654	1.181848214	25.50111873	29.53763444	0.863343298	67.69046629	75.33095935	0.89857433
NSFTV_122	2.775701746	3.082577321	0.900448377	24.60528539	28.32930111	0.868545443	66.94046629	77.28929268	0.866102716
NSFTV_123	3.10903508	3.165910654	0.982035003	22.60528539	25.91263444	0.872365388	58.39879963	74.16429268	0.78742475
NSFTV_124	2.276892967	2.488749464	0.914874317	17.97171854	21.91418503	0.820095227	53.49998133	67.45857684	0.79307901
NSFTV_125	3.942368413	3.499243988	1.126634332	24.81361873	30.87096777	0.803784932	63.64879963	79.66429268	0.798962716
NSFTV_128	2.942368413	2.665910654	1.103701059	24.75111873	28.70430111	0.862279093	66.83629963	74.91429268	0.892170202
NSFTV_129	3.775701746	3.212602342	1.175278277	22.04278539	26.91379162	0.819014493	57.75296629	78.49765084	0.735728594
NSFTV_130	2.963654288	2.915910654	1.01637349	22.82475884	27.12096777	0.841590869	59.15467218	77.83095935	0.760040383
NSFTV_131	2.48403508	2.249243988	1.104386671	23.14695206	24.16263444	0.95796475	61.83629963	70.49762601	0.877140169
NSFTV_132	2.046987621	1.749243988	1.170212752	21.78309217	22.70430111	0.959425796	60.19633885	69.03929268	0.871914189
NSFTV_134	1.713654288	1.587602342	1.079397682	23.57475884	27.55962495	0.855409276	61.69633885	78.2268175	0.788685272
NSFTV_138	2.407942364	2.837602342	0.848583443	19.83367429	25.12212495	0.789490313	62.45082271	79.45598417	0.785980104
NSFTV_139	1.630320955	1.749243988	0.932014611	20.28309217	24.87096777	0.815532888	56.65467218	71.91429268	0.787808238
NSFTV_140	2.130320955	2.082577321	1.022925263	21.82475884	25.45430111	0.857409471	60.52967218	72.45595935	0.8353995
NSFTV_141	3.442368413	2.832577321	1.215277827	23.73028539	27.91263444	0.85016287	63.31546629	79.91429268	0.792292144
NSFTV_142	2.942368413	2.915910654	1.009073584	24.37611873	29.41263444	0.828763529	66.37796629	76.16429268	0.87151031
NSFTV_143	3.491275697	3.657650417	0.954513226	18.75034096	20.9633923	0.894432575	50.60915605	57.37211388	0.882121167
NSFTV_144	3.221600272	3.224069381	0.999234164	20.9938757	23.3378116	0.899564881	51.90104181	61.59244281	0.842652758
NSFTV_145	2.741981064	2.510711027	1.092113363	25.33690226	27.35748775	0.926141409	73.52016926	76.05075131	0.966725088
NSFTV_146	3.082555015	3.669117455	0.840135279	21.48612449	23.32491228	0.921166358	66.61385901	76.71690585	0.868307425
NSFTV_147	1.804933606	1.59404436	1.132298229	20.7438757	24.14915442	0.858989733	56.44270848	67.59241798	0.835044968
NSFTV_148	2.471600272	2.688855978	0.919201435	21.82720903	26.32342752	0.829193273	67.60937515	81.92818377	0.825227315
NSFTV_149	1.304933606	1.543717638	0.845318842	23.32720903	26.16668165	0.891485185	65.94270848	75.01399921	0.879072029
NSFTV_150	1.491981064	0.890736047	1.674997963	23.89940226	27.1503116	0.88026254	68.37433592	80.84244281	0.845772759
NSFTV_151	3.158647731	2.510711027	1.258069008	19.56606892	23.89915442	0.818692937	50.18683592	60.92575131	0.823737662
NSFTV_152	2.082555015	2.182402714	0.954248729	21.75279116	27.7128116	0.784936277	65.03052567	76.17577614	0.853690359
NSFTV_153	2.116981064	2.010711027	1.052851969	21.48273559	23.48248775	0.914840702	60.52016926	73.13408465	0.827523439
NSFTV_154	2.804933606	2.390736047	1.173251062	22.8688757	26.35864493	0.867604377	62.02604181	74.52994281	0.832229832
NSFTV_155	2.888266939	2.760711027	1.046204007	22.78554237	25.94082109	0.878366274	58.52604181	75.55075131	0.774658634
NSFTV_156	3.971600272	3.760711027	1.056076961	16.95220903	17.94082109	0.944895942	48.35937515	56.04241798	0.86290665
NSFTV_157	2.366981064	1.927377693	1.228083667	19.00356892	21.31582109	0.891524134	51.31183592	57.67575131	0.889660468
NSFTV_158	2.471600272	2.109138551	1.171852969	19.70220903	23.9891012	0.821298342	50.81770848	64.83078508	0.783851505
NSFTV_160	2.008598197	2.321671652	0.865151709	18.7673503	22.21688347	0.844733706	53.9966353	69.76095023	0.774023793
NSFTV_161	2.372795572	2.383195637	0.995636084	16.28983141	19.29882294	0.844084194	46.35681735	58.02364276	0.798929801
NSFTV_162	3.456128905	3.078243711	1.122759999	18.99816475	21.80675696	0.871205415	58.48181735	71.8356058	0.814106274
NSFTV_163	4.653229989	4.873477066	0.954806994	22.39199319	24.86696484	0.900471502	61.22469308	69.69768735	0.878432204
NSFTV_164	1.039462238	0.661577045	1.57118849	22.99816475	27.22342363	0.844793258	60.60681735	73.04393914	0.829730955
NSFTV_165	1.910177284	1.2068104	1.582831308	22.13057736	23.78363151	0.930496142	63.17561667	72.44768735	0.872017023
NSFTV_166	2.706471009	3.078243711	0.879225709	24.61912027	29.34842363	0.838856648	68.36765781	84.16893914	0.812267073
NSFTV_168	2.789462238	2.494910378	1.118061099	23.28983141	28.05675696	0.830097058	59.14848401	76.04393914	0.777819833
NSFTV_171	2.917935886	2.911577045	1.002183985	18.9091235	22.09842363	0.855677483	50.75936247	59.5856058	0.851872894
NSFTV_173	3.872795572	3.494910378	1.10812443	20.12316475	22.80675696	0.882333459	53.19015068	61.91893914	0.859028779
NSFTV_174	2.053650151	2.079019818	0.987797294	25.13180449	24.90224233	1.009218534	68.02643068	76.98361553	0.883648166
NSFTV_176	2.122795572	1.578243711	1.34503661	22.95649808	26.26509029	0.874030808	64.31515068	75.79393914	0.848552687
NSFTV_177	2.706128905	2.244910378	1.205450753	21.66483141	24.26509029	0.892839514	56.27348401	73.2106058	0.768652074
NSFTV_179	2.706128905	2.383195637	1.135504305	24.53983141	27.54882294	0.89077604	65.77348401	77.6694761	0.84683826
NSFTV_180	2.872795572	2.828243711	1.015752483	23.95649808	26.64009029	0.899264898	61.06515068	74.91893914	0.81508296
NSFTV_181	2.918024246	1.905004986	1.531767249	24.51812807	26.94605014	0.909896921	59.04877888	75.59428357	0.781127568
NSFTV_182	2.372795572	1.911577045	1.241276452	25.03983141	28.89009029	0.86672735	66.99015068	79.66893914	0.840856567
NSFTV_183	1.706128905	1.328243711	1.284499893	19.37316475	22.80675696	0.849448468	54.10681735	63.41893914	0.853164971
NSFTV_184	1.758598197	1.272006045	1.382539182	22.43401697	26.26946639	0.853995914	64.72580197	66.34518143	0.975591604
NSFTV_185	2.407514943	2.543925211	0.946378035	21.61374725	24.02724233	0.899551723	57.5267271	69.06694886	0.83291253
NSFTV_186	2.539462238	2.161577045	1.174819211	21.45649808	24.72342363	0.867861119	50.40681735	68.37727247	0.737186722
NSFTV_187	1.872795572	1.328243711	1.409978874	22.99816475	26.18175696	0.87840418	59.19015068	81.12727247	0.729596212
NSFTV_188	2.124302332	1.912116554	1.110969061	21.28257051	23.57675084	0.902693109	58.7057942	68.20127765	0.860772646
NSFTV_189	2.790968999	3.162116554	0.882626858	23.61590384	32.1319117	0.734967283	66.03912754	81.07627765	0.814530828
NSFTV_190	1.874302332	1.745449887	1.07382191	21.80757051	25.11841751	0.868190462	63.2557942	73.61794432	0.859244234
NSFTV_191	2.290968999	2.245449887	1.020271711	22.07423717	26.70175084	0.826696246	60.16412754	73.61794432	0.817248133
NSFTV_192	2.040968999	1.912116554	1.067387338	26.64090384	28.74341751	0.926852342	66.7557942	80.86794432	0.82549142
NSFTV_193	1.707635665	1.495449887	1.141887589	22.99090384	28.70175084	0.801027922	61.37246087	75.70127765	0.810718957
NSFTV_195	2.624302332	2.245449887	1.168720062	19.93257051	23.78508417	0.838028168	53.62246087	61.65961099	0.869652922
NSFTV_198	2.124302332	2.078783221	1.021896998	19.82423717	22.66008417	0.87485276	55.41412754	65.28461099	0.848808421
NSFTV_199	2.040968999	2.078783221	0.981809444	21.36590384	22.95175084	0.930905184	60.21412754	71.90961099	0.837358549
NSFTV_200	2.14849656	1.912116554	1.123622175	23.53772693	29.61841751	0.794699005	63.8203653	79.49294432	0.802843143
NSFTV_201	1.223107033	0.535874387	2.282451005	22.44494813	28.6403908	0.783681629	62.083352	80.67329403	0.769565105
NSFTV_202	1.975341952	1.643743852	1.201733439	20.11685119	25.78105417	0.780295913	56.89147929	72.07532997	0.789333595
NSFTV_203	2.866050146	2.56559865	1.117107754	25.39282797	30.74804066	0.825835644	75.54015847	90.0517953	0.838852332
NSFTV_205	2.306440366	2.511250536	0.918442956	20.86161479	26.50248163	0.787157032	65.333352	80.79142316	0.808666928
NSFTV_206	2.6397737	2.427917203	1.087258534	21.86161479	29.33581497	0.745219276	60.16668534	78.29142316	0.768496508
NSFTV_207	1.806440366	2.011250536	0.898167749	22.86161479	27.5441483	0.829998973	57.54168534	78.08308983	0.736928898
NSFTV_208	3.3897737	3.128669499	1.083455348	21.48661479	27.39332996	0.784373963	56.333352	76.4443481	0.736919778
NSFTV_209	3.056440366	2.849878645	1.072480883	15.48661479	19.15946909	0.808300832	44.32501867	55.95345058	0.792176679
NSFTV_204	2.806440366	2.094583869	1.33985581	24.65328146	28.71081497	0.858675781	61.083352	78.7497565	0.775664011
NSFTV_211	3.225341952	2.815705295	1.145482788	20.53351786	24.10470829	0.851846768	52.26647929	65.44569072	0.798623694
NSFTV_213	2.223107033	2.261250536	0.983131678	24.31994813	32.58581497	0.746335427	66.79168534	85.8747565	0.777780201
NSFTV_214	1.223107033	1.011250536	1.209499515	20.77828146	28.08581497	0.739814084	54.083352	77.16642316	0.700866384
NSFTV_215	2.129089337	2.141545311	0.994183652	20.37568667	24.45113575	0.833322708	54.51282363	70.18261725	0.776728281
NSFTV_217	2.000728443	1.752990298	1.141323169	24.20386358	27.21990616	0.889197172	65.58783586	77.91591103	0.84177718
NSFTV_218	2.556440366	2.261250536	1.130542735	22.69494813	28.62748163	0.792767887	54.79168534	75.91642316	0.721736919
NSFTV_219	2.556440366	2.535874387	1.008110015	24.02828146	28.61955747	0.839575576	66.12501867	82.5899607	0.800642331
NSFTV_220	2.220845857	1.844583869	1.203982044	21.69384502	28.5441483	0.760010241	63.39963233	88.04142316	0.720111398
NSFTV_221	2.3897737	2.427917203	0.984289619	20.48661479	24.37748163	0.840390944	56.66668534	74.95808983	0.755978247
NSFTV_222	2.973107033	2.927917203	1.015434122	25.40328146	29.62748163	0.857422908	70.91668534	88.3747565	0.802454096
NSFTV_223	2.119241205	2.011250536	1.053693295	23.2635109	28.08581497	0.828301081	58.05196787	80.41642316	0.721891942
NSFTV_224	2.723107033	2.261250536	1.204248264	23.73661479	27.4191483	0.865694825	63.75001867	77.29142316	0.824800684
NSFTV_225	2.8897737	2.511250536	1.150730944	24.36161479	29.0441483	0.838778763	64.50001867	80.41642316	0.8020752
NSFTV_226	2.473107033	2.344583869	1.054817047	21.31994813	27.46081497	0.776377109	51.62501867	70.54142316	0.731839767
NSFTV_228	2.1397737	1.761250536	1.214917274	20.69494813	23.6691483	0.874342746	62.12501867	75.3747565	0.824215182
NSFTV_232	2.618800848	2.756757588	0.949956884	18.7427237	23.20258112	0.807786151	48.62345099	60.96391377	0.797577583
NSFTV_233	2.685725321	2.466017181	1.089094326	23.02086885	26.27560709	0.876130807	58.38955268	72.60434162	0.804215717
NSFTV_234	4.019058654	3.966017181	1.01337399	13.32086885	16.40060709	0.812218034	38.05621935	49.30434162	0.771863453
NSFTV_235	3.602391988	3.716017181	0.969422856	23.10420218	26.06727375	0.886329825	66.55621935	77.30434162	0.860963536
NSFTV_236	1.769058654	1.964280747	0.900613956	20.52086885	28.39166271	0.722777988	59.76455268	79.16760449	0.754911723
NSFTV_237	2.621793894	2.966017181	0.883944271	23.34758786	29.73394042	0.785216743	64.37907698	79.34600829	0.811371339
NSFTV_240	2.269929469	2.000216503	1.134841886	21.17592135	25.77570501	0.821545767	50.56446698	65.34503547	0.773807323
NSFTV_241	3.144929469	3.333549836	0.943417565	13.57175468	16.06737168	0.844677957	40.50196698	52.26170214	0.774983694
NSFTV_242	1.466281236	1.124377964	1.304082153	22.86957939	28.30409151	0.807995529	59.63435373	72.77610922	0.81942212
NSFTV_243	2.201505618	2.000216503	1.100633664	27.8908354	29.69237168	0.939326629	69.41301763	83.84503547	0.827872721
NSFTV_248	2.757217542	2.341810074	1.177387344	23.09025328	27.01661382	0.854668666	60.57520043	77.88721427	0.777729708
NSFTV_250	2.673884209	2.341810074	1.141802334	24.25691995	28.89161382	0.83958342	61.2418671	72.63721427	0.843119711
NSFTV_251	2.01538737	1.845069869	1.092309513	17.1683355	20.90023947	0.821442048	48.66625642	58.20145877	0.836169014
NSFTV_252	1.923884209	2.508476741	0.766953178	25.63191995	27.72494715	0.924507441	65.07520043	76.92888094	0.84591378
NSFTV_254	2.915938224	2.413676369	1.208089975	20.33780308	24.07176051	0.844882246	66.37049747	76.1674223	0.871376442
NSFTV_255	3.43645348	3.347970988	1.026428691	23.36669949	25.90918574	0.901869311	68.09870311	78.13924324	0.871504513
NSFTV_257	3.090550875	2.341810074	1.319727381	26.34025328	29.05828048	0.906462903	69.03353376	83.92888094	0.822524178
NSFTV_258	2.257217542	2.258476741	0.999442457	24.29858661	26.39161382	0.920693474	69.87520043	78.22054761	0.893310039
NSFTV_259	2.923884209	2.258476741	1.294626664	23.42358661	24.97494715	0.937883331	63.15853376	71.47054761	0.883700152
NSFTV_261	2.590550875	2.675143407	0.968378319	25.42358661	27.43328048	0.926742488	67.9918671	75.26221427	0.90339977
NSFTV_262	3.840550875	3.841810074	0.999672238	18.21525328	19.84994715	0.917647445	50.6168671	59.42888094	0.851721693
NSFTV_264	2.507217542	2.341810074	1.070632316	24.09025328	26.72494715	0.90141444	66.90853376	75.63721427	0.88459807
NSFTV_266	2.173884209	2.008476741	1.082354684	21.67358661	25.01661382	0.866367718	53.3668671	66.13721427	0.806911323
NSFTV_267	3.688659827	2.796122959	1.319205157	21.2148306	24.54759669	0.864232489	54.5882032	66.08511507	0.826028723
NSFTV_268	2.173884209	2.175143407	0.999421096	29.67358661	31.59994715	0.939039122	82.32520043	90.67888094	0.907876228
NSFTV_269	2.507217542	2.341810074	1.070632316	18.88191995	21.14161382	0.893116302	57.6168671	66.26221427	0.869528248
NSFTV_270	2.340550875	1.841810074	1.270788399	24.34025328	28.30828048	0.859828038	67.1168671	79.84554761	0.840583716
NSFTV_271	1.923884209	1.591810074	1.208614168	28.84025328	31.72494715	0.909071752	72.90853376	87.09554761	0.837109769
NSFTV_272	3.923884209	3.925143407	0.999679197	13.88191995	19.34994715	0.717413843	43.82520043	60.76221427	0.721257462
NSFTV_273	1.930904359	1.508476741	1.280035884	23.09832694	28.14161382	0.820788995	59.47892107	76.34554761	0.779075178
NSFTV_274	1.605758637	1.048067523	1.532113726	25.2699093	30.89413457	0.817951681	69.17125877	81.31329207	0.85067591
NSFTV_275	2.474237621	2.750660985	0.899506568	22.04966635	25.18850673	0.875386008	60.2793785	77.134035	0.781488723
NSFTV_277	3.182570954	2.128669499	1.495098678	21.40383302	23.6016633	0.906878161	47.50854517	59.27768143	0.801457547
NSFTV_278	2.474237621	2.647998575	0.934380269	19.36216635	26.41591835	0.732973433	47.7793785	74.20585822	0.643876099
NSFTV_279	2.307570954	2.147998575	1.074288867	27.13299968	33.77008501	0.803462582	70.1543785	85.39335822	0.821543736
NSFTV_280	2.527926061	2.106331909	1.200155612	23.21951598	26.81175168	0.866020104	63.08200694	75.39335822	0.836705095
NSFTV_282	2.349237621	2.064665242	1.137829791	20.94549968	24.87425168	0.84205547	48.25854517	63.78085822	0.75663054
NSFTV_283	3.377204429	3.005089622	1.123828189	20.21016859	25.23490971	0.800881351	54.01818265	67.45606087	0.800790647
NSFTV_285	2.043871095	1.671756289	1.222589147	22.54350192	25.48490971	0.884582374	57.60151599	68.1643942	0.845038185
NSFTV_286	1.847505356	1.939665242	0.952486705	21.01615592	25.83258501	0.813552183	54.99612026	71.95585822	0.764303583
NSFTV_287	2.043871095	2.255089622	0.90633697	25.29350192	31.60990971	0.800176342	64.10151599	79.62272753	0.805065563
NSFTV_288	2.765669735	1.996829384	1.385030568	25.2922062	26.32733423	0.960682383	70.2861043	80.2472154	0.875869698
NSFTV_289	2.377204429	2.588422955	0.918398759	25.16850192	29.10990971	0.864602542	67.35151599	88.7893942	0.758553616
NSFTV_290	2.627204429	2.522998575	1.041302383	21.58516859	26.60341835	0.811368235	55.51818265	75.58085822	0.734553483
NSFTV_291	2.793871095	2.505089622	1.115277901	16.12683525	20.81824304	0.774649197	40.22651599	51.70606087	0.77798454
NSFTV_293	2.293871095	1.838422955	1.247738497	23.50183525	26.40157638	0.890167879	64.18484932	84.99772753	0.755136063
NSFTV_296	3.043871095	2.285984591	1.331536139	21.08516859	26.08701477	0.808262991	51.18484932	66.33854934	0.771570223
NSFTV_297	2.960537762	2.088422955	1.417594915	21.04350192	24.81824304	0.847904579	45.80984932	59.37272753	0.771563835
NSFTV_298	3.265958467	2.81839226	1.158801957	17.97602864	22.7029921	0.791791168	56.97906934	71.19549452	0.800318471
NSFTV_299	3.224237621	2.671756289	1.206785826	22.73716635	26.15157638	0.869437697	60.07104517	69.74772753	0.861261683
NSFTV_300	2.182570954	2.255089622	0.967842224	21.75799968	26.06824304	0.834655395	57.86271184	70.74772753	0.817873787
NSFTV_301	2.460537762	3.005089622	0.818790143	21.33516859	25.85990971	0.825028735	61.60151599	78.95606087	0.780199966
NSFTV_302	2.975387298	3.421756289	0.869549742	23.43217492	27.52657638	0.851256422	68.71671385	85.33106087	0.805295436
NSFTV_303	2.877204429	2.23496635	1.287359171	22.00183525	25.19736625	0.87317996	49.93484932	60.98275058	0.818835635
NSFTV_304	3.043871095	3.088422955	0.98557456	20.33516859	25.15157638	0.808504735	65.22651599	83.0393942	0.785488823
NSFTV_305	2.517053965	1.921756289	1.309767518	25.78634158	32.10990971	0.803064905	69.19588052	86.24772753	0.802292217
NSFTV_306	2.710537762	2.588422955	1.0471773	24.87683525	29.90157638	0.831957317	69.72651599	85.4143942	0.816332149
NSFTV_309	2.347505356	2.755089622	0.85206134	19.76615592	24.77657638	0.797775916	62.57945359	74.87272753	0.835811058
NSFTV_310	1.682570954	1.356331909	1.240530392	23.00799968	28.24925168	0.814464041	56.98771184	76.58085822	0.744150864
NSFTV_311	2.377204429	2.505089622	0.948949853	19.25183525	24.35990971	0.790308153	48.10151599	64.33106087	0.74771837
NSFTV_312	2.877204429	2.882303941	0.998230751	23.91850192	28.65394453	0.834736798	65.55984932	78.97124047	0.830173731
NSFTV_313	2.369679046	2.584089346	0.917026746	19.3835745	21.17069889	0.915585007	56.59532782	61.91904065	0.914021393
NSFTV_314	2.950777459	2.618262696	1.126998243	18.5533381	22.51712635	0.823965625	56.95386719	68.38513385	0.832839888
NSFTV_315	2.700777459	2.284929363	1.18199604	22.83667143	24.85045969	0.918963742	65.28720053	73.21846719	0.891676691
NSFTV_316	1.867444126	1.868262696	0.999561855	18.7533381	22.64212635	0.828249865	56.07886719	65.96846719	0.850085951
NSFTV_317	1.862507309	1.645417661	1.131935892	22.05715852	24.84530383	0.887779786	62.23452088	76.17025064	0.81704498
NSFTV_318	2.534110793	1.868262696	1.35639961	22.83667143	26.85045969	0.850513239	66.41220053	76.13513385	0.872293738
NSFTV_320	2.583146805	2.201596029	1.173306443	22.55269462	29.05879302	0.77610569	64.05760975	82.34346719	0.777931898
NSFTV_323	2.311621357	2.368262696	0.976083169	23.47229359	28.14212635	0.834062547	63.82147164	74.63513385	0.855112979
NSFTV_324	2.367444126	2.284929363	1.03611261	21.42000477	25.93379302	0.825949553	58.87053386	71.21846719	0.82661894
NSFTV_325	2.707280672	2.701596029	1.00210418	22.54635607	28.47545969	0.791781988	65.8013973	84.92680052	0.774801322
NSFTV_328	2.561447339	2.701596029	0.948123743	23.4421894	27.76712635	0.844242544	64.0826473	80.76013385	0.793493575
NSFTV_329	3.192831475	3.273462324	0.975368328	19.41755457	23.57227304	0.823745531	59.49916423	71.83200855	0.828309906
NSFTV_330	2.950777459	3.284929363	0.898277294	20.8783381	27.14212635	0.76922264	67.82886719	86.71846719	0.782173272
NSFTV_331	3.034110793	2.951596029	1.027955981	21.21167143	23.22545969	0.913293933	59.45386719	73.38513385	0.810162278
NSFTV_332	3.034110793	2.618262696	1.158825964	20.54500477	27.26712635	0.75347158	52.82886719	72.46846719	0.728991094
NSFTV_333	2.784110793	2.368262696	1.175592048	25.5033381	32.68379302	0.780305336	61.91220053	70.63513385	0.876507159
NSFTV_334	1.784110793	1.951596029	0.914180377	25.5033381	28.01712635	0.910276728	64.74553386	79.67680052	0.81260208
NSFTV_335	2.025389452	1.840374864	1.100530925	19.30672523	22.46518059	0.859406634	51.79344105	66.57217514	0.778004338
NSFTV_336	2.450777459	2.284929363	1.072583468	20.2533381	24.47545969	0.827495718	62.37053386	70.92680052	0.87936483
NSFTV_337	3.117444126	3.201596029	0.97371564	23.3783381	26.85045969	0.870686699	60.78720053	76.55180052	0.794066242
NSFTV_340	3.880013397	3.791090277	1.023455817	23.90478431	28.03469828	0.852685628	59.35236988	83.63716282	0.70964112
NSFTV_341	2.617444126	2.618262696	0.999687361	24.33667143	26.51712635	0.917771824	63.12053386	75.42680052	0.836844907
NSFTV_343	2.284110793	1.868262696	1.222585452	26.7533381	28.55879302	0.93678112	72.20386719	87.38513385	0.826271747
NSFTV_345	1.957855511	1.701596029	1.150599483	22.25844369	28.10045969	0.792102476	63.57214831	82.21846719	0.773210089
NSFTV_346	2.950777459	2.784929363	1.059551994	22.08667143	25.72545969	0.858553033	60.70386719	72.84346719	0.833346758
NSFTV_347	2.784110793	2.534929363	1.098299161	20.54500477	26.26712635	0.782156544	60.20386719	72.46846719	0.830759495
NSFTV_348	2.867444126	2.784929363	1.029629033	22.7533381	26.43379302	0.860767052	60.66220053	78.13513385	0.776375461
NSFTV_349	2.950777459	2.869220596	1.028424745	18.2533381	23.86783615	0.764767195	56.32886719	65.76308875	0.856542298
NSFTV_353	1.609498142	1.856795657	0.8668149	24.91755457	27.90560638	0.892922886	64.58249757	82.41534189	0.783622273
NSFTV_355	2.040968999	2.047703021	0.996711426	24.78257051	28.48469012	0.870031248	61.91412754	81.25005359	0.762019529
NSFTV_356	3.040968999	3.162116554	0.961687827	22.86590384	26.57675084	0.860372435	67.37246087	76.32627765	0.882690247
NSFTV_357	2.457635665	2.245449887	1.094495887	27.44923717	29.03508417	0.945381698	66.53912754	76.49294432	0.869872746
NSFTV_358	1.676771624	1.572211162	1.066505356	23.28092273	29.00771069	0.802577045	62.86644549	81.12662208	0.774917578
NSFTV_359	1.957635665	1.828783221	1.07045802	20.99090384	23.78508417	0.882523841	61.12246087	73.57627765	0.830735977
NSFTV_360	2.457635665	2.412116554	1.018871025	20.11590384	23.24341751	0.865445188	55.99746087	67.61794432	0.828144976
NSFTV_363	2.540968999	2.412116554	1.05341883	22.28257051	23.61841751	0.943440453	56.62246087	67.49294432	0.838938965
NSFTV_364	2.957635665	2.828783221	1.045550484	25.28257051	29.36841751	0.860876161	58.37246087	78.99294432	0.738957908
NSFTV_366	3.124302332	3.245449887	0.962671568	20.40757051	22.70175084	0.898942582	55.24746087	63.95127765	0.863899251
NSFTV_367	2.624302332	2.995449887	0.876096223	22.15757051	25.28508417	0.876309937	52.53912754	70.32627765	0.747076758
NSFTV_368	2.457635665	1.995449887	1.231619837	22.53257051	26.07675084	0.864086582	59.4557942	72.61794432	0.818747966
NSFTV_369	2.790968999	2.995449887	0.931736168	22.28257051	27.91008417	0.798369878	65.2057942	77.40961099	0.842347525
NSFTV_370	2.040968999	2.162116554	0.943968074	24.94923717	28.45175084	0.876896375	66.99746087	76.45127765	0.876341939
NSFTV_371	2.65482427	2.46771135	1.075824476	20.6840961	24.52892912	0.843253124	59.26346912	71.65509165	0.827065708
NSFTV_372	2.874302332	2.912116554	0.987014867	18.94923717	23.57675084	0.803725556	52.99746087	68.28461099	0.776125984
NSFTV_375	2.276892967	2.219008908	1.026085546	22.43005187	27.32197663	0.820952751	57.62498133	72.21961637	0.797913146
NSFTV_376	2.457635665	2.422703021	1.014418872	27.24090384	31.18260679	0.873592898	69.78912754	81.10422025	0.860487004
NSFTV_377	2.290968999	2.162116554	1.059595513	21.86590384	27.86841751	0.784612324	55.78912754	74.20127765	0.751862088
NSFTV_378	2.290968999	2.162116554	1.059595513	21.82423717	29.74341751	0.733750154	61.28912754	91.40961099	0.670488878
NSFTV_379	2.040968999	2.328783221	0.876410041	23.69923717	27.61841751	0.858095406	60.41412754	74.82627765	0.807391861
NSFTV_380	2.957635665	2.307610287	1.281687676	19.78257051	24.40670561	0.810538334	48.5807942	61.91622578	0.784621375
NSFTV_381	2.040968999	1.578783221	1.292748093	23.24090384	26.24341751	0.885589837	59.74746087	73.49294432	0.812968666
NSFTV_384	2.540968999	2.328783221	1.091114439	21.44923717	24.86841751	0.862509131	57.8307942	72.24294432	0.800504392
NSFTV_385	2.624302332	2.662116554	0.98579543	22.15757051	27.24341751	0.813318318	64.78912754	78.49294432	0.825413393
NSFTV_386	2.624302332	1.828783221	1.43499913	25.32423717	30.57675084	0.828218711	63.66412754	78.61794432	0.809791303
NSFTV_387	2.442590769	2.21771135	1.101401573	20.89059706	24.79976245	0.842370853	54.74973453	66.86342499	0.818829346
NSFTV_389	2.040968999	1.662116554	1.227933741	20.32423717	24.20175084	0.839783754	54.2057942	65.61794432	0.826081871
NSFTV_391	2.040968999	1.724276953	1.183666577	20.24090384	24.42753894	0.828610033	59.17246087	76.16622578	0.776885821
NSFTV_392	2.624302332	2.745449887	0.955873332	19.44923717	23.53508417	0.826393355	56.4557942	64.74294432	0.871999178
NSFTV_394	2.790968999	2.578783221	1.082281355	24.07423717	29.45175084	0.817412768	62.5807942	74.90961099	0.835417423
NSFTV_395	2.374302332	2.162116554	1.098137992	18.74090384	21.91008417	0.855355173	55.12246087	68.40961099	0.805770711
NSFTV_396	2.374302332	2.078783221	1.142159658	20.40757051	23.74341751	0.859504345	54.78912754	65.20127765	0.840307575
NSFTV_616	2.526892967	2.738749464	0.922644806	16.93005187	20.62251837	0.820949778	53.87498133	67.41691017	0.799131571
NSFTV_619	1.860226301	1.738749464	1.069864485	16.88838521	20.87251837	0.80912063	46.87498133	63.33357684	0.740128439
NSFTV_621	2.026892967	2.052342242	0.987599887	20.13838521	24.24905996	0.830481068	55.62498133	69.0529497	0.805540988
NSFTV_622	2.443559634	2.072082798	1.179277023	21.80505187	24.2058517	0.900817379	63.74998133	70.3752435	0.905858057
NSFTV_641	1.897608013	1.367316153	1.387834122	19.64579782	22.64105958	0.867706644	52.36044732	61.73732505	0.848116553
NSFTV_642	3.147608013	3.033982819	1.037450836	13.64579782	17.39105958	0.784644418	40.19378065	50.61232505	0.794150054
NSFTV_643	3.237703973	3.117316153	1.03861906	15.12077049	17.84939291	0.847130799	50.2152512	59.73732505	0.840600933
NSFTV_647	2.410177284	2.4568104	0.981018838	20.38057736	23.90863151	0.852435965	56.92561667	66.07268735	0.861560487
NSFTV_651	2.147608013	1.700649486	1.262816371	23.60413115	28.30772625	0.83384059	64.40211399	77.19565838	0.834271193
NSFTV_19	2.524658048	2.522922814	1.000687787	26.04981548	30.09394583	0.865616481	71.35852071	80.00800337	0.891892282
NSFTV_30	3.247036638	4.158127616	0.780889126	20.83256669	24.45222585	0.851970157	59.27070352	68.67419251	0.863070993
NSFTV_36	2.497036638	2.364516385	1.056045394	20.87423335	28.0015213	0.745467831	54.43737018	75.42518217	0.721739989
NSFTV_52	2.407736937	1.89223156	1.272432501	19.97427945	24.08547485	0.829308103	51.48338837	63.18409448	0.81481564
NSFTV_54	1.657736937	1.644176124	1.008247786	23.22427945	27.93201273	0.831457428	68.60838837	80.80810483	0.849028554
NSFTV_62	3.621028926	3.398844072	1.065370711	20.40757076	24.76181155	0.824154999	51.61896595	62.92558793	0.820317579
NSFTV_91	2.411684044	2.374016576	1.015866556	22.19831645	29.05362539	0.764046351	55.00792686	79.14669253	0.695012326
NSFTV_104	NA	1.442114068	NA	NA	25.09266077	NA	NA	67.7766679	NA
NSFTV_159	2.721600272	4.015736047	0.677733855	17.70220903	22.69197826	0.780108672	56.90104181	68.21744281	0.834112794
NSFTV_169	2.743510617	2.623477066	1.045753612	21.08891069	24.61696484	0.856682001	58.34228333	72.82268735	0.801155319
NSFTV_172	2.539462238	2.661577045	0.954119379	14.58149808	16.97342363	0.859078192	44.52348401	50.50227247	0.881613477
NSFTV_229	2.723107033	2.594583869	1.049535174	24.27828146	27.08581497	0.896346722	70.29168534	75.4997565	0.931018703
NSFTV_245	2.201505618	2.083549836	1.056612892	23.0158354	27.35903834	0.841251623	63.16301763	79.38670214	0.795637253
NSFTV_247	2.423884209	2.175143407	1.114356047	23.00691995	27.80828048	0.827340617	59.40853376	77.72054761	0.764386454
NSFTV_263	2.423884209	1.925143407	1.259066831	24.75691995	25.39161382	0.975003799	66.2418671	76.92888094	0.861079302
NSFTV_265	2.590550875	2.008476741	1.28980875	23.92358661	29.34994715	0.815115151	66.90853376	78.97054761	0.847259336
NSFTV_281	3.140904288	3.189665242	0.98471283	21.67466635	24.91591835	0.869912401	56.94604517	71.45585822	0.796940189
NSFTV_284	3.543871095	3.255089622	1.088716904	14.62683525	19.77657638	0.739604013	44.51818265	60.83106087	0.73183308
NSFTV_292	2.183720632	2.005089622	1.089088791	22.78634158	27.69324304	0.822812321	61.90421385	79.74772753	0.776250506
NSFTV_294	1.845507277	1.505089622	1.226177664	22.05892868	26.77657638	0.823814381	61.32965617	75.08106087	0.816845892
NSFTV_295	2.81359509	2.208903844	1.273751729	22.01470423	24.37568876	0.903141833	54.57496386	71.34507838	0.764943639
NSFTV_390	3.207635665	2.995449887	1.07083603	15.53257051	18.32675084	0.847535422	45.16412754	53.36794432	0.846278194
NSFTV_620	3.193559634	2.655416131	1.202658821	15.09671854	19.0808517	0.79119731	47.291648	58.34191017	0.810594783
NSFTV_623	3.193559634	3.247009702	0.983538679	15.63838521	18.90509384	0.827204844	48.20831467	62.12575564	0.77597953
NSFTV_624	1.776892967	1.655416131	1.07338145	21.22171854	23.16418503	0.916143543	57.916648	60.54191017	0.956637275
NSFTV_625	2.053650151	2.168925211	0.946851528	20.73597115	21.63140899	0.958604738	59.50559735	58.25444886	1.021477304
NSFTV_626	3.943559634	3.655416131	1.078826457	15.88838521	16.91418503	0.93935269	45.58331467	52.08357684	0.87519555
NSFTV_627	2.276892967	2.215035583	1.027926136	22.18005187	25.75534772	0.861182389	58.74998133	76.30901567	0.769895678
NSFTV_633	5.872795572	5.661577045	1.037307366	14.78983141	17.05675696	0.867095161	43.01515068	50.29393914	0.855275037
NSFTV_634	3.178650151	3.405416131	0.9334102	15.31930449	17.5808517	0.871363046	46.77643068	53.70857684	0.87093037
NSFTV_244	3.618172285	3.750216503	0.964790241	20.09916874	21.98403834	0.914261903	60.62135096	66.3033688	0.914302728
NSFTV_135	1.880320955	1.774407349	1.059689567	21.57475884	18.79970416	1.147611614	60.36300552	57.93266873	1.041951059
NSFTV_326	2.117444126	1.868262696	1.133376013	21.17000477	25.14212635	0.842013299	62.53720053	73.51013385	0.850728971
NSFTV_37	1.830369971	1.947849719	0.939687468	20.58256669	26.79318797	0.768201481	56.31237018	74.8835155	0.751999553
NSFTV_629	1.443559634	1.655416131	0.87202221	21.34671854	24.2058517	0.881882563	64.87498133	75.0002435	0.864996943
NSFTV_342	2.534110793	2.034929363	1.245306515	24.54500477	28.80879302	0.851996984	63.66220053	77.34346719	0.823110249
NSFTV_90	3.161684044	3.040683242	1.039793952	22.66498312	25.97029205	0.87272731	63.60792686	73.5633592	0.864668601
NSFTV_327	2.700777459	2.618262696	1.031515082	22.08667143	26.85045969	0.822580756	62.37053386	80.96846719	0.770306467
NSFTV_322	2.284110793	2.094009305	1.090783497	19.42000477	25.02579516	0.775999509	59.53720053	74.0365675	0.804159384
NSFTV_112	2.746476124	3.052150281	0.899849572	18.26874729	21.6234787	0.844856998	53.03926183	65.0414845	0.815468193
NSFTV_352	2.610226301	2.781508908	0.938420975	25.47171854	28.41572663	0.896395115	64.62498133	75.13628303	0.860103518
NSFTV_231	3.6397737	2.844583869	1.279545222	17.23661479	19.4191483	0.887609205	49.333352	61.04142316	0.808194656
NSFTV_227	2.223107033	2.177917203	1.020749104	24.69494813	27.83581497	0.887164545	65.75001867	82.58308983	0.796168063
NSFTV_167	1.539462238	1.252258544	1.22934856	22.20649808	24.40224233	0.910018751	64.69015068	73.42111553	0.881083735
NSFTV_253	1.923884209	2.427087971	0.792671807	21.09025328	25.63398503	0.822745791	54.3668671	71.38622461	0.761587651
NSFTV_246	2.547408223	2.08971075	1.219024318	24.37561495	28.79327694	0.846573143	63.93652031	80.80539777	0.79124071
NSFTV_239	2.547408223	2.08971075	1.219024318	21.79228161	27.0849436	0.804590252	50.68652031	70.0137311	0.723951138
NSFTV_397	1.829362259	1.905416131	0.960085427	20.01338521	22.12251837	0.904661254	56.12498133	62.3752435	0.899795787
NSFTV_618	2.053650151	1.322082798	1.553344582	19.90263782	23.16418503	0.859198707	51.65143068	64.33357684	0.802868941
NSFTV_373	2.374302332	2.578783221	0.920706445	24.49090384	29.95175084	0.817678538	66.78912754	85.28461099	0.783132229
NSFTV_260	2.332604891	2.413676369	0.96641162	25.58780308	27.78009384	0.921084113	72.16216414	82.95908897	0.869852418
NSFTV_338	2.89495469	2.090374864	1.384897388	21.47229359	26.70268059	0.804125021	55.48813831	72.2388418	0.768120542
NSFTV_249	2.687980365	2.091810074	1.285002113	21.75339007	26.14161382	0.832136463	61.5992432	77.26221427	0.797275146
NSFTV_388	3.040968999	2.662116554	1.142312493	17.65757051	20.32675084	0.868686326	49.24746087	61.65961099	0.798698858
NSFTV_365	2.624302332	2.662116554	0.98579543	18.94923717	22.91008417	0.827113381	50.62246087	67.82627765	0.746354696
NSFTV_307	1.127204429	0.838422955	1.344434121	22.79350192	29.73490971	0.766556958	56.01818265	77.58106087	0.722060024
NSFTV_21	2.636132794	3.031183052	0.869671263	20.05820347	22.54318797	0.889767831	57.62807962	65.21684884	0.883637904
NSFTV_256	2.757217542	2.675143407	1.030680275	23.96525328	27.22494715	0.880268129	61.57520043	76.76221427	0.802155084
NSFTV_339	2.617444126	2.868262696	0.912553836	26.2533381	28.64212635	0.916598781	69.20386719	80.92680052	0.85514152
NSFTV_133	2.394291075	1.631191915	1.467816909	20.60474692	26.14410014	0.788122246	54.96746051	69.31476883	0.793012246
NSFTV_216	3.3897737	3.349878645	1.011909403	19.65328146	23.49280242	0.836566073	50.66668534	62.47428391	0.811000658
